# Supplementary material
Source: publisher figshare collection journal article supplement (https://acs.figshare.com/ndownloader/files/4818718)
Supplement: Supplementary file 1 [file 4818718]

# SUPPORTING INFORMATION:

## Distinguishing Bonds

Martin Rahm\* and Roald Hoffmann

Chemistry and Chemical Biology, Baker Laboratory, Cornell University, Ithaca, NY 14853, USA.

### Table of Contents

|                                                                                                      |   |
|------------------------------------------------------------------------------------------------------|---|
| Test of Reliability with Respect to the Level of Theory .....                                        | 1 |
| Analysis of Some Homonuclear Diatomics .....                                                         | 2 |
| Q and Select Bond Characteristics For All Investigated Diatomics, Including Correlation Energy. .... | 3 |
| Tentative Relationship Between Q and Overlap of Atomic Orbitals .....                                | 5 |
| Comments on the Possibility of Scaled Measures of Covalency (0-100%) .....                           | 6 |

### Test of Reliability with Respect to the Level of Theory

**TABLE S0.** Reliability of  $\Delta E$ ,  $\Delta\bar{\chi}$ ,  $\Delta\omega$  and Q with respect to level of theory, tested on nitrogen oxide. The experimental bond length and the 6-31+G(d) basis set was used. All levels of theory agree on  $\Delta\bar{\chi}$ , but the missing correlation energy in Hartree-Fock (UHF) results in a too small bond energy, and a greatly overestimated Q.

| <sup>2</sup> NO        | $\Delta E$ | $\Delta E/n$ | $\Delta\bar{\chi}$ | $\Delta\omega/n$ | $\Delta(V_{NN}+\omega)/n$ | Q    |
|------------------------|------------|--------------|--------------------|------------------|---------------------------|------|
| Best Est. <sup>a</sup> | -6.66      | -0.44        | -2.08              | -45.08           | +1.64                     | 8.4  |
| ULC-BLYP               | -6.81      | -0.45        | -2.11              | -45.06           | +1.65                     | 8.3  |
| UB3LYP                 | -6.53      | -0.44        | -2.12              | -45.03           | +1.68                     | 8.7  |
| UPBE                   | -7.28      | -0.49        | -2.07              | -45.13           | +1.58                     | 7.5  |
| U $\omega$ B97X-D      | -6.48      | -0.43        | -2.16              | -44.99           | +1.73                     | 9.0  |
| UHF                    | -2.10      | -0.14        | -2.12              | -44.74           | +1.98                     | 29.3 |

<sup>a</sup>  $\Delta E$  is experimental,  $\Delta\bar{\chi}$  evaluated using ULC-BLYP/aug-cc-pVQZ

## Analysis of Some Homonuclear Diatomics

**TABLE S1.** Bond character of homonuclear diatomics determined via an intermixed use of experimental and theoretical data.

| Reaction <sup>a</sup> :                          | $\Delta E^b$<br>[eV] | $\Delta E/n$<br>[eV e <sup>-1</sup> ] | $\Delta\bar{\chi}^c$<br>[eV e <sup>-1</sup> ] | $\Delta(V_{\text{NN}} + \omega)/n$<br>[eV e <sup>-1</sup> ] | Q     |
|--------------------------------------------------|----------------------|---------------------------------------|-----------------------------------------------|-------------------------------------------------------------|-------|
| 2 <sup>2</sup> H → H <sub>2</sub>                | -4.792               | -2.396                                | -1.828 <sup>a</sup>                           | -0.568                                                      | 0.53  |
| 2 <sup>2</sup> Li → Li <sub>2</sub>              | -1.09                | -0.181                                | +0.54                                         | -0.72                                                       | -6.9  |
| 2 Be → Be <sub>2</sub>                           | -0.11 <sup>d</sup>   | -0.014                                | -0.10                                         | +0.09                                                       | 13.2  |
| 2 <sup>2</sup> B → <sup>3</sup> B <sub>2</sub>   | -3.07                | -0.307                                | -0.59                                         | +0.29                                                       | 2.9   |
| 2 <sup>3</sup> C → C <sub>2</sub>                | -6.29                | -0.524                                | -1.08                                         | +0.56                                                       | 3.1   |
| 2 <sup>4</sup> N → N <sub>2</sub>                | -9.94                | -0.710                                | -2.35                                         | +1.64                                                       | 5.6   |
| 2 <sup>3</sup> O → <sup>3</sup> O <sub>2</sub>   | -5.26                | -0.329                                | -1.70                                         | +1.37                                                       | 9.3   |
| 2 <sup>2</sup> F → F <sub>2</sub>                | -1.70                | -0.095                                | -0.80                                         | +0.71                                                       | 16.0  |
| 2 <sup>2</sup> Na → Na <sub>2</sub>              | -1.81                | -0.035                                | +0.60                                         | -0.63                                                       | -35.2 |
| 2 <sup>2</sup> Al → <sup>3</sup> Al <sub>2</sub> | -1.81                | -0.070                                | -0.09                                         | +0.02                                                       | 1.5   |
| 2 <sup>2</sup> Cl → Cl <sub>2</sub>              | -2.55                | -0.075                                | -0.43                                         | +0.35                                                       | 10.4  |

<sup>a</sup>The spin multiplicity is singlet, unless otherwise specified. <sup>b</sup>Experimental data from NIST Chemistry WebBook.  $\Delta E \approx \Delta H^0 - E_{\text{ZPE}}$ , where  $E_{\text{ZPE}} = \frac{1}{2}h\sum v_i$ . <sup>c</sup>From LC-BLYP/aug-cc-pVQZ calculations, except for H and H<sub>2</sub>, where the experimental values of  $\bar{\chi}_{\text{H}} = -13.598$  eV and  $\bar{\chi}_{\text{H}_2} = -15.426$  eV were used. <sup>d</sup> $\Delta E \approx \Delta H^0$  as  $E_{\text{ZPE}}$  can be presumed small, and no vibrational data is available for Be<sub>2</sub>.

## Q and Select Bond Characteristics For All Investigated Diatomics, Including Correlation Energy.

**TABLE S2.** A Q value deviating from unity implies the presence of multielectron effects. One part of such multielectron effects includes the missing post-Hartree-Fock correlation energy.

| Species <sup>a</sup>        | Q    | $\Delta E^b$          | $\Delta\bar{\chi}^c$  | $\Delta(V_{\text{NN}} + \omega)/n$ | $\Delta E$             | Correlation energy <sup>d</sup><br>(%) |
|-----------------------------|------|-----------------------|-----------------------|------------------------------------|------------------------|----------------------------------------|
|                             |      | Exp. (eV)             | [eV e <sup>-1</sup> ] | [eV e <sup>-1</sup> ]              | HF/aug-cc-pVQZ<br>(eV) |                                        |
| Ne <sub>2</sub>             | ~79  | -364x10 <sup>-5</sup> | -727x10 <sup>-5</sup> | +708x10 <sup>-5</sup>              | +159x10 <sup>-5f</sup> | 144                                    |
| Kr <sub>2</sub>             | ~57  | -173x10 <sup>-4</sup> | -693x10 <sup>-5</sup> | +669x10 <sup>-5</sup>              | +167x10 <sup>-4f</sup> | 197                                    |
| Xe <sub>2</sub>             | ~57  | -243x10 <sup>-4</sup> | -658x10 <sup>-5</sup> | +635x10 <sup>-5</sup>              | +233x10 <sup>-4f</sup> | 196                                    |
| Ar <sub>2</sub>             | ~37  | -123x10 <sup>-4</sup> | -646x10 <sup>-5</sup> | +611x10 <sup>-5</sup>              | +110x10 <sup>-4f</sup> | 189                                    |
| He <sub>2</sub>             | ~29  | -944x10 <sup>-6</sup> | -354x10 <sup>-5</sup> | +330x10 <sup>-5</sup>              | -720x10 <sup>-6f</sup> | 177                                    |
| I <sub>2</sub>              | 24.8 | -1.58                 | -0.19                 | +0.18                              | -0.65 <sup>f</sup>     | 59                                     |
| F <sub>2</sub>              | 16.0 | -1.70                 | -0.80                 | +0.71                              | +1.6                   | 195                                    |
| OF                          | 14.2 | -2.31                 | -1.03                 | +0.90                              | +0.7                   | 129                                    |
| Be <sub>2</sub>             | 13.2 | -0.11 <sup>e</sup>    | -0.10                 | +0.09                              | +0.3                   | 384                                    |
| ClF                         | 13.0 | -2.65                 | -0.71                 | +0.61                              | -0.3                   | 87                                     |
| NF                          | 11.3 | -3.21                 | -1.24                 | +1.04                              | -0.9                   | 73                                     |
| H <sub>2</sub> <sup>+</sup> | 11.3 | -2.65                 | -16.34                | +13.688                            | -2.8                   | 5                                      |
| Cl <sub>2</sub>             | 10.4 | -2.55                 | -0.43                 | +0.35                              | -0.8                   | 69                                     |
| O <sub>2</sub>              | 9.3  | -5.26                 | -1.70                 | +1.37                              | -1.4                   | 73                                     |
| NO                          | 8.4  | -6.66                 | -2.08                 | +1.64                              | -2.3                   | 65                                     |
| CF                          | 7.8  | -5.69                 | -1.68                 | +1.30                              | -3.5                   | 38                                     |
| N <sub>2</sub>              | 5.6  | -9.94                 | -2.35                 | +1.64                              | -5.0                   | 50                                     |
| BF                          | 4.7  | -7.91                 | -1.62                 | +1.05                              | -6.0                   | 25                                     |
| CO                          | 4.0  | -11.29                | -2.02                 | +1.22                              | -7.6                   | 33                                     |
| CN                          | 3.4  | -7.95                 | -1.33                 | +0.72                              | -3.9                   | 51                                     |
| C <sub>2</sub>              | 3.1  | -6.29                 | -1.08                 | +0.56                              | -0.5                   | 92                                     |
| B <sub>2</sub>              | 2.9  | -3.07                 | -0.59                 | +0.29                              | -0.8                   | 75                                     |
| Al <sub>2</sub>             | 1.5  | -1.81                 | -0.09                 | +0.02                              | -0.4                   | 77                                     |
| CH                          | 1.3  | -3.71                 | -0.61                 | +0.08                              | -2.47                  | 33                                     |
| BH                          | 1.1  | -3.62                 | -0.64                 | +0.03                              | -2.7                   | 26                                     |
| BN                          | 0.7  | -5.85                 | -0.43                 | -0.06                              | -2.3                   | 60                                     |
| H <sub>2</sub>              | 0.5  | -4.79                 | -1.83                 | -0.568                             | -3.6                   | 24                                     |
| BO                          | -0.8 | -8.27                 | -0.08                 | -0.56                              | -5.8                   | 30                                     |
| AlH                         | -1.9 | -3.10                 | +0.10                 | -0.324                             | -2.3                   | 27                                     |
| HF                          | -2.4 | -6.17                 | +0.42                 | -1.04                              | -4.2                   | 32                                     |
| LiH                         | -3.9 | -2.58                 | +0.93                 | -1.57                              | -1.5                   | 43                                     |
| SiS                         | -3.1 | -6.48                 | +0.22                 | -0.44                              | -3.9                   | 40                                     |
| HCl                         | -3.2 | -4.66                 | +0.28                 | -0.54                              | -3.3                   | 29                                     |
| BeF                         | -3.4 | -6.02                 | +0.55                 | -1.01                              | -5.0                   | 17                                     |
| Li <sub>2</sub>             | -6.9 | -1.09                 | +0.53                 | -0.72                              | -0.2                   | 85                                     |

|                 |        |       |       |       |                    |     |
|-----------------|--------|-------|-------|-------|--------------------|-----|
| NaH             | -7.0   | -2.16 | +0.54 | -0.72 | -0.9               | 58  |
| AlO             | -8.8   | -5.37 | +1.00 | -1.25 | -2.4               | 55  |
| Cu <sub>2</sub> | -9.0   | -2.08 | +0.14 | -0.18 | -0.7               | 65  |
| AlS             | -10.3  | -3.86 | +0.62 | -0.75 | -2.5               | 35  |
| BeO             | -14.9  | -4.62 | +2.68 | -3.06 | -1.7               | 64  |
| LiF             | -17.0  | -6.06 | +4.03 | -4.54 | -3.9               | 35  |
| NaF             | -25.2  | -4.98 | +3.01 | -3.26 | -2.9               | 42  |
| NaCl            | -29.9  | -4.27 | +2.21 | -2.36 | -3.0               | 29  |
| H <sup>-</sup>  | -33.1  | -0.75 | +6.05 | -6.42 | +0.33              | 144 |
| Na <sub>2</sub> | -35.2  | -0.77 | +0.60 | -0.63 | +0.03              | 104 |
| CsCl            | -39.8  | -4.55 | +1.23 | -1.29 | -3.36 <sup>f</sup> | 26  |
| KBr             | -70.9  | -3.96 | +2.56 | -2.64 | -2.97 <sup>f</sup> | 25  |
| CsI             | -103.0 | -3.50 | +1.65 | -1.68 | -2.79 <sup>f</sup> | 20  |
| Cs <sub>2</sub> | -131.3 | -0.48 | +0.28 | -0.29 | +0.23 <sup>f</sup> | 149 |

<sup>a</sup> The spin multiplicity is that of the ground state. <sup>b</sup> Experimental data from NIST Chemistry WebBook.  $\Delta E \approx \Delta H^0 - E_{\text{ZPE}}$ , where  $E_{\text{ZPE}} = \frac{1}{2}h\sum v_i$ . <sup>c</sup> From LC-BLYP/aug-cc-pVQZ calculations. Exceptions are H and H<sub>2</sub>, where the experimental values of  $\bar{\chi}_{\text{H}} = -13.598$  eV and  $\bar{\chi}_{\text{H}_2} = -15.426$  eV were used. CsCl, KBr, CsI, Cs<sub>2</sub> and I<sub>2</sub> were calculated using a Douglas-Kroll-Hess 2<sup>nd</sup> order scalar relativistic Hamiltonian and the ANO-RCC basis set. All noble gas-dimers where calculated using a Douglas-Kroll-Hess 2<sup>nd</sup> order scalar relativistic Hamiltonian and the QZP-DKH basis set. <sup>d</sup> Correlation energy defined as the difference between the Hartree-Fock and experimental bond dissociation energies. <sup>e</sup>  $\Delta E \approx \Delta H^0$  as  $E_{\text{ZPE}}$  can be presumed small, and no vibrational data is available for Be<sub>2</sub>. <sup>f</sup> Calculated using a Douglas-Kroll-Hess 2<sup>nd</sup> order scalar relativistic Hamiltonian and the basis set specified in footnote c.

## Tentative Relationship Between Q and Overlap of Atomic Orbitals

**TABLE S3.** Molecules with predicted high covalency (Q near 1) hints at a relation with the spatial overlap of atomic orbitals.

| Bond          | $d_{\text{exp}} [\text{\AA}]$ | Q   | Bond orbital type |
|---------------|-------------------------------|-----|-------------------|
| BH            | 1.232                         | 1.1 | $2p-1s, \sigma_u$ |
| $^3\text{BN}$ | 1.281                         | 0.7 | $2p-2p, \sigma_g$ |
| $\text{H}_2$  | 0.741                         | 0.5 | $1s-1s, \sigma_g$ |
| $\text{Al}_2$ | 2.466                         | 1.5 | $3p-3p, \sigma_g$ |

## Comments on the Possibility of Scaled Measures of Covalency (0-100%)

The concept of “covalency” might be thought of as a percentage, or fraction of a whole. Because the Q scale (Eq. S0) is unbound and because it has a *sign* which allows for two ways of diverging from the “perfectly covalent” case at Q = 1, the Q scale inherently conveys more information than any arbitrarily bound percentage value for covalency could.

$$Q = \frac{\overbrace{\Delta\bar{\chi}}^{\text{"covalency"}}}{\Delta E / n} - \frac{\overbrace{\Delta(V_{NN} + \omega) / n}^{\text{multielectron-contribution}}}{\Delta E / n} = \frac{\Delta\bar{\chi} - \Delta(V_{NN} + \omega) / n}{\Delta\bar{\chi} + \Delta(V_{NN} + \omega) / n} = \frac{K - 1}{K + 1} = \frac{2n\Delta\bar{\chi}}{\Delta E} - 1$$

$$K = \frac{\Delta\bar{\chi}}{\Delta(V_{NN} + \omega) / n} \quad (\text{S0})$$

If one is willing to live without this extra information, one can introduce different arbitrary scaling formulations for Q that, for instance, constrain the scale between zero and one hundred percent. We do not advise this, we merely comment on the possibility. Different approaches to the arbitrary scaling of Q can be conceived by basing a measure of covalency on the two units of Q within the range -1.0 < Q < 1.0,

$$Q - \text{Covalence (0-100\%)} = 100 \times \left( 1 - \frac{|Q - 1|}{2 + |Q - 1|} \right) \quad (\text{S1})$$

Equation S1 could serve the purpose of connecting the intuitively engrained concept of bond covalency as a fraction or percentage to the measure of bond character that is Q. The quite significant downside is, again, that the sign of Q (which is informative) is lost. A further downside with the scaling described by equation S1 handles the singularity at Q = -1 by forcing a value of 50% at this point. As have been argued in the main text the covalency at Q = -1 should equal 0%, because at this point  $\Delta E = \Delta(V_{NN} + \omega)/n$  and  $\Delta\bar{\chi} = 0$ .

### Expressing Covalency (0-100 %) as a function of $\Delta(V_{NN} + \omega)/n$ and $\Delta\bar{\chi}$

Another formulation (not based on Q) that makes away with the singularity is given by equation S2.

$$\text{Covalency (\%)} = \underbrace{\frac{100 \times (|\Delta\bar{\chi}| - \Delta\bar{\chi})}{2} \times \left( \frac{1}{|(\Delta V_{NN} + \Delta\omega) / n| - \Delta\bar{\chi}} \right)}_{\text{active for nuclear-resisted bonds}} + \underbrace{\frac{100 \times (|\Delta\bar{\chi}| + \Delta\bar{\chi})}{2} \times \left( \frac{1}{(\Delta V_{NN} + \Delta\omega) / n} + \frac{1}{\Delta\bar{\chi}} \right)}_{\text{active for multielectron-favored bonds}} \quad (\text{S2})$$

In this formulation, covalence is expressed differently depending whether the bond in question is nuclear-resisted ( $\Delta\bar{\chi} < 0$ ) or multielectron-favored ( $\Delta\bar{\chi} > 0$ ). Nuclear favored bonds are here constrained from 50-100%, and multielectron-favored bond range from 0-50%. Quite chemically reasonable values are obtained, as shown by Table S4. H<sub>2</sub>, HF and NaCl, are for instance classified as 76, 59 and 6% covalent, respectively.

**TABLE S4.** Example “covalency” percentages calculated using equation S2.

| Species <sup>a</sup> | Q   | Covalency (%) |
|----------------------|-----|---------------|
| BH                   | 1.1 | 95.2          |
| CH                   | 1.3 | 88.6          |
| BN                   | 0.7 | 87.4          |
| Al <sub>2</sub>      | 1.5 | 83.4          |
| H <sub>2</sub>       | 0.5 | 76.3          |

|                             |       |      |
|-----------------------------|-------|------|
| AlH                         | -1.9  | 68.3 |
| B <sub>2</sub>              | 2.9   | 67.4 |
| C <sub>2</sub>              | 3.1   | 66.0 |
| CN                          | 3.4   | 64.9 |
| CO                          | 4.0   | 62.4 |
| BF                          | 4.7   | 60.6 |
| HF                          | -2.4  | 59.3 |
| N <sub>2</sub>              | 5.6   | 58.9 |
| CF                          | 7.8   | 56.4 |
| NO                          | 8.4   | 56.0 |
| O <sub>2</sub>              | 9.3   | 55.4 |
| Cl <sub>2</sub>             | 10.4  | 54.8 |
| NF                          | 11.3  | 54.4 |
| H <sub>2</sub> <sup>+</sup> | 11.3  | 54.4 |
| Be <sub>2</sub>             | 13.2  | 53.8 |
| ClF                         | 13.0  | 53.8 |
| OF                          | 14.2  | 53.5 |
| F <sub>2</sub>              | 16.0  | 53.1 |
| I <sub>2</sub>              | 24.8  | 52.0 |
| He <sub>2</sub>             | ~29   | 51.7 |
| Ar <sub>2</sub>             | ~37   | 51.4 |
| Kr <sub>2</sub>             | ~57   | 50.9 |
| Xe <sub>2</sub>             | ~57   | 50.9 |
| Ne <sub>2</sub>             | ~79   | 50.6 |
| SiS                         | -3.1  | 49.3 |
| HCl                         | -3.2  | 47.6 |
| BeF                         | -3.4  | 45.8 |
| LiH                         | -3.9  | 41.0 |
| Li <sub>2</sub>             | -6.9  | 25.3 |
| NaH                         | -7.0  | 24.9 |
| AlO                         | -8.8  | 20.4 |
| Cu <sub>2</sub>             | -9.0  | 20.0 |
| AlS                         | -10.3 | 17.8 |
| BeO                         | -14.9 | 12.6 |
| BO                          | -0.8  | 11.8 |
| LiF                         | -17.0 | 11.1 |
| NaF                         | -25.2 | 7.6  |
| NaCl                        | -29.9 | 6.5  |
| H <sup>-</sup>              | -33.1 | 5.9  |
| Na <sub>2</sub>             | -35.2 | 5.5  |
| CsCl                        | -39.8 | 4.9  |
| KBr                         | -70.9 | 2.8  |

|                 |        |     |
|-----------------|--------|-----|
| CsI             | -103.0 | 1.9 |
| Cs <sub>2</sub> | -131.3 | 1.5 |

---
